# Supplementary material
Source: PubMed Central journal article supplement (PMC3896210)
Supplement: 1322827111_pnas.201322827SI.pdf [file 1322827111_pnas.201322827SI.pdf]

# Supporting Information

Zhi et al. 10.1073/pnas.1322827111

## SI Materials and Methods

**Protein Preparation.** Proteins fused to maltose binding protein (MBP) or MBP with a histidine tag in front of its N terminus (HisMBP) were expressed in *Escherichia coli* BL21 (DE3) following the same general method as described previously (1). Briefly, proteins were first purified by maltose affinity chromatography, followed by gel filtration chromatography (Superdex 200) in 10 mM Tris, pH 8.0, 100 mM NaCl, 5% (vol/vol) glycerol, 1 mM EDTA, and 1 mM DTT. We generated a total of 17 sets of MBP-small heterodimer partner (SHP) (E60A, E85D, L126T/E127T/E128R, E207R, K228R, E251D, E254L, E85D/L126T/E127T/E128R/E207R, E85D/L126T/E127T/E128R/K228R, L126T/E127T/E128R/E207R/K228R, E85D/E207R/K228R, E251D/E254L, E60A/E251D/E254L, E251D/E254L/E85D/L126T/E127T/E128R/E207R, E251D/E254L/E85D/L126T/E127T/E128R/K228R, E251D/E254L/L126T/E127T/E128R/E207R/K228R, and E251D/E254L/E85D/L126T/E127T/E128R/E207R/K228R) homologous mutants. Mutated residues were predicted to be solvent-exposed and have flexible side chains based on the position of the homologous amino acids in the DAX-1 structure (2). Only MBP-SHPE85D/L126T/E127T/E128R/K228R yielded improved crystals. To obtain the soluble full-length MBP-SHP protein, the last 10 cysteines in mouse SHP were mutated to serines.

**Protein Crystallization.** Before crystal screen, MBP proteins were supplemented with 1 mM maltose to stabilize MBP. MBP-SHP proteins alone or mixed with the E1A-like inhibitor of differentiation (EID1) peptide (YSGAMHRVSAALEEANKVFLR-

TARAGDALDG) at a molar ratio of 1:1.5 were applied to Hampton and Qiagen crystal screens. The crystals appeared within 2 d and grew to the final size in about 1 wk. Then they were mounted to the appropriate loops with 20% ethylene glycol and flash-frozen.

**AlphaScreen Assays.** Interactions between SHP and EID1 (or LRH-1) were assessed by luminescence-proximity AlphaScreen technology as described previously (3). Reaction mixtures consisted of 50 nM HisMBP fusion proteins, 200 nM biotinylated peptides/proteins, 10  $\mu$ g/mL nickel chelate-coated acceptor beads (PerkinElmer Life Sciences), and 10  $\mu$ g/mL streptavidin-coated donor beads (PerkinElmer Life Sciences) in a buffer containing 50 mM 3-(N-morpholino)propanesulfonic acid (MOPS), pH 7.4, 50 mM NaF, 50 mM 3-[(3-Cholamidopropyl)dimethylammonio]-1-propanesulfonate (CHAPS), and 0.1 mg/mL BSA.

**Cell Reporter Assays.** Plates (24-well) containing AD293 cells were used to measure SHP repressor activity. Each well contained 100 ng of pG5-luc (Promega), 1 ng of Renilla-luc (transfection control), 50 ng of Gal4-LRH-1 or HNF4 $\alpha$ , and Flag-SHP. Ten nanograms of Flag-SHP was used to repress Gal4-LRH-1 and 50 ng of Flag-SHP was used to repress Gal4-HNF4 $\alpha$ . Two days after transfection, the cells were lysed following the protocol in the dual-luciferase reporter assay system (Promega) kit. Firefly luciferase (from pG5-luc) was measured first and then Renilla luciferase. Relative light unit (RLU) was calculated by dividing Firefly luciferase by Renilla luciferase.

1. Pioszak AA, Xu HE (2008) Molecular recognition of parathyroid hormone by its G protein-coupled receptor. *Proc Natl Acad Sci USA* 105(13):5034–5039.  
2. Sablin EP, et al. (2008) The structure of corepressor Dax-1 bound to its target nuclear receptor LRH-1. *Proc Natl Acad Sci USA* 105(47):18390–18395.

3. Zhi X, et al. (2012) Structural conservation of ligand binding reveals a bile acid-like signaling pathway in nematodes. *J Biol Chem* 287(7):4894–4903.

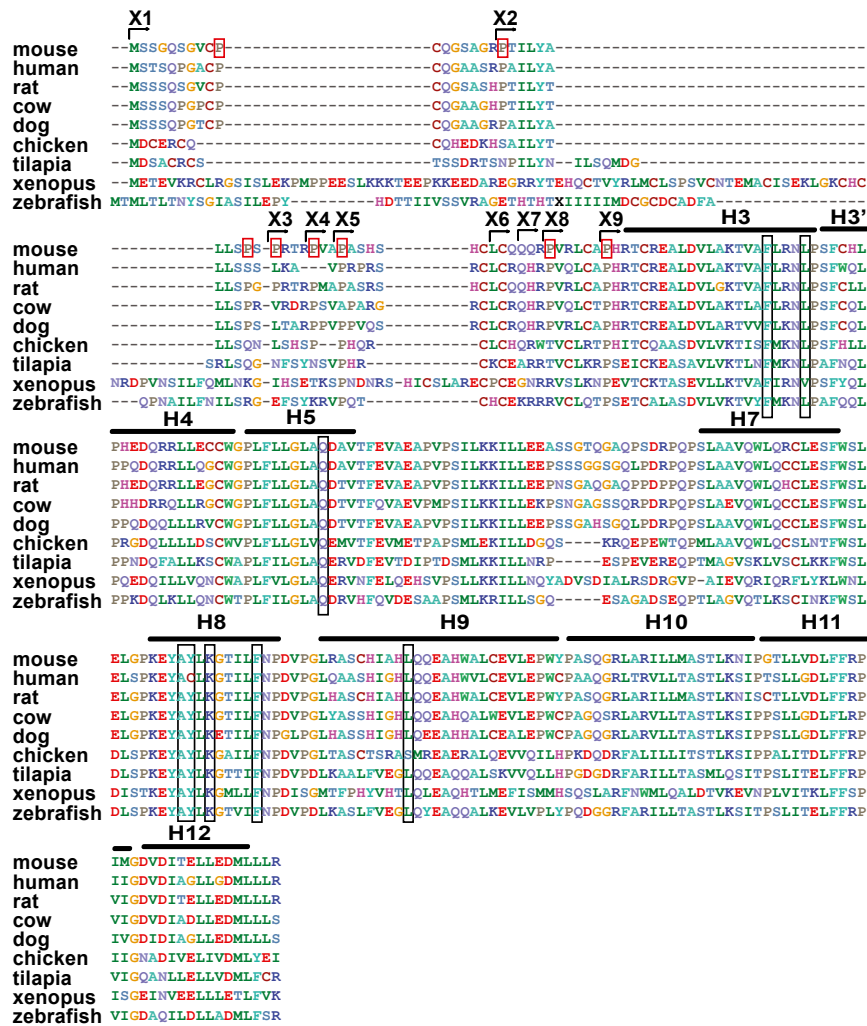

**Fig. S1.** The full-length sequence alignment of SHP from mouse (NP\_035980), human (NP\_068804), rat (NP\_476474), cow (XP\_002685805), dog (XP\_854945), chicken (NP\_001026064), tilapia (XP\_003452125), *Xenopus* (XP\_002936259), and zebrafish (NP\_001243120). A series of mouse MBP-SHP N-terminal truncation constructs were made (designated by arrowheads and named the letter “X” followed by numbers). Constructs X6–X9 were expressed to be soluble and then tested in crystallization. MBP-SHPX9 yielded the initial needle-like crystals. The positions of several prolines N-terminal to helix H3 in the mouse SHP protein sequence that are conserved across species are highlighted by red boxes. Helices H3–H12 are labeled by H and numbers. Traditional helices H1–H2 are not present in SHP. The amino acids involved in SHP/EID1 binding are conserved and highlighted by black boxes.

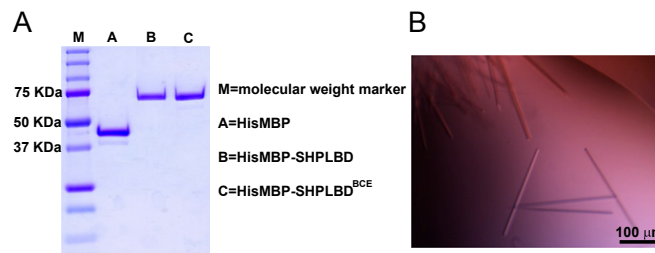

**Fig. S2.** Protein expression and crystallization of SHP. (A) Coomassie Blue-stained SDS/PAGE gel with ~1 μg of soluble HisMBP protein per lane. HisMBP-SHP LBD is mouse SHP (amino acids 46–260) fused to HisMBP. HisMBP-SHPLBD<sup>BCE</sup> is mouse SHP (amino acids 46–260), containing the combination of mutations indicated in Fig. 1A, fused to HisMBP. (B) Representative picture of MBP-SHP<sup>BCE</sup> crystals that diffracted up to 6–7 Å.



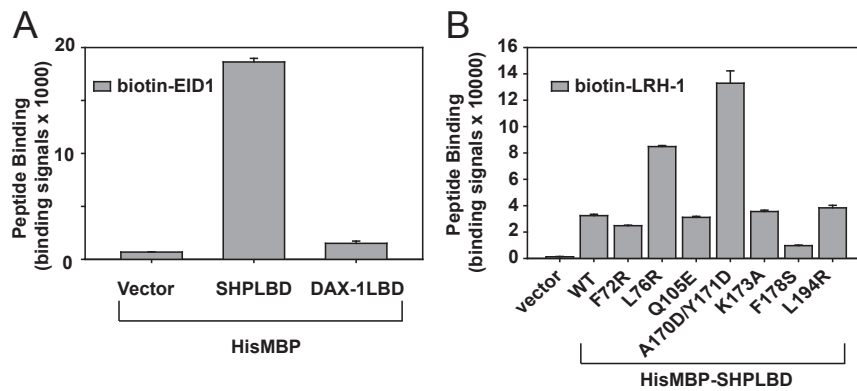

**Fig. 56.** The SHP–EID1 interface is receptor-specific and different from the SHP–LRH-1 interface. (A) EID1 does not bind to DAX-1. Error bars = SD ( $n = 3$ ). (B) Mutations of SHP–EID1 interface residues do not abolish the SHP–LRH-1 interaction. The same proteins that were used to generate the data in Fig. 3B were tested in AlphaScreen binding assays against biotinylated MBP-LRH-1. Error bars = SD ( $n = 3$ ).

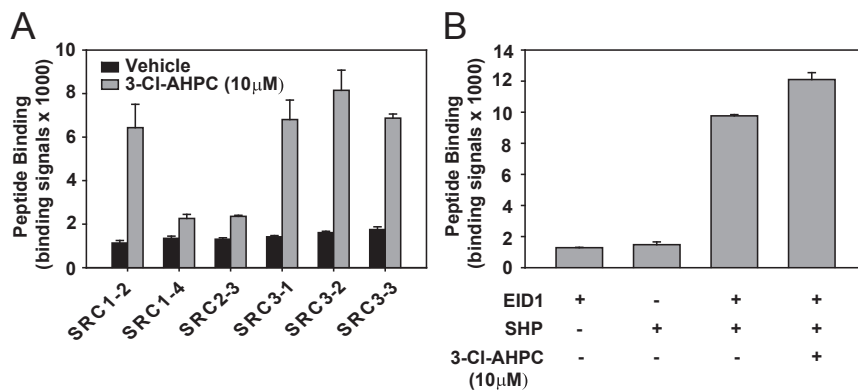

**Fig. 57.** 3-Cl-AHPC promotes SHP interaction with specific LXXLL-containing peptides. (A) HisMBP-SHP LBD binds to biotinylated SRC1-2, SRC3-1, SRC3-2, and SRC3-3 LXXLL-containing peptides in the presence of 3-Cl-AHPC (10 μM) in *in vitro* ligand-binding assays. Error bars = SD ( $n = 3$ ). (B) 3-Cl-AHPC does not change SHP interaction with the biotinylated EID1 peptide. HisMBP-SHP LBD and the biotinylated EID1 peptide were used in assays. Error bars = SD ( $n = 3$ ).

**Table S1.** Sequence of peptides used in AlphaScreen assays

| Peptide     | Sequence                  |
|-------------|---------------------------|
| EID1        | YSGAMHRVSAALEEANKVFLRT    |
| EID1-ΔNKVFL | YSGAMHRVSAALEEA           |
| SRC1-2      | SPSSHSLTERHKILHRLQLQEGSP  |
| SRC1-4      | QKPTSGPQTPQAQKSLQLLQTE    |
| PGC1α-1     | QEAEEPSLLKLLLAPANTQ       |
| TRAP-1      | GHGEDFSKVSQNPILTSLLQITGN  |
| CBP-1       | SGNLVPDAASKHKQLSELLRGGSG  |
| NcoR-2      | GHSFADPASNLGLEDIIRKALMGSF |
| SHP-1       | PCQGSASHPTILYLLSPGP       |
| SHP-2       | VAEAPVPSILKKILLEEPS       |
| SMRT-2      | ASTNMGLEAIRKALMGKYDQ      |
| SRC2-3      | QEPVSPKKENALLRYLLDKDDTKD  |
| SRC3-1      | AENQRGPLESKGHKLLQLLTSS    |
| SRC3-2      | TSNMHGSLLEKHLRHLKLLQNG    |
| SRC3-3      | KENALLRYLLDRDD            |
